# Supplementary material for: Synthesis of qualitative research studies regarding the factors surrounding UK critical care trial infrastructure
Source: PubMed Central journal article supplement — BMJ Open. 2019 Dec 22;9(12):e030815. doi: 10.1136/bmjopen-2019-030815 (PMC6937020; doi:10.1136/bmjopen-2019-030815), 2019-12-22
Supplement: bmjopen-2019-030815supp002.pdf [file bmjopen-2019-030815supp002.pdf]

Supplementary File 2. Table 1. Participants/units

| Profession and Area                  | Level 3/2 beds† | Annual admissions | General /Specialist unit               | Research staff numbers including whole time equivalent (WTE)                              | Research team working patterns                                 | Consultant numbers and funded consultant time (Professional Activity session [PA]) †† for research | Number (total) of ongoing clinical trials (both NIHR and non-NIHR/in set-up) |
|--------------------------------------|-----------------|-------------------|----------------------------------------|-------------------------------------------------------------------------------------------|----------------------------------------------------------------|----------------------------------------------------------------------------------------------------|------------------------------------------------------------------------------|
| Nurse/ CRN Eastern                   | 14              | 1000              | General                                | 1 (work with Emergency Department [ED]); (1 WTE)                                          | 5 days/week 8-4pm (flexible)                                   | 7<br>1 PA                                                                                          | 6                                                                            |
| Nurse/CRN Yorkshire and Humber       | 24              | 1600              | General                                | 2; (2 WTE)                                                                                | 5 days (flexible – 9 hour cover)                               | 13<br>0.5 PA (shared)                                                                              | 5                                                                            |
| Nurse/ CRN West Midlands             | 25              | 1600              | General                                | 1 (was 4); (1 WTE)                                                                        | 5 days/week; 8-4pm                                             | <i>Data not provided/ unknown</i><br>1 PA                                                          | 6                                                                            |
| Consultant/ CRN Wessex               | 12              | 900               | General                                | 2 (across all Division 6*, not just ICU); 1 WTE)                                          | 5 days/week; 8-4pm                                             | <i>Data not provided/ unknown</i><br>2 PAs                                                         | 6                                                                            |
| Trial co-ordinator/ CRN London South | 63              | 3100              | General/trauma                         | 6 across ED/ICU; ( <i>Data not provided/ unknown</i> )                                    | 5 days/week (and on-call at weekends/nights as required)       | >50 (exact number unknown)<br>0 PA                                                                 | 5                                                                            |
| Consultant/ CRN North West London    | 44              | 2600              | General/ Trauma/ Neuro                 | 2 fellows + 5 nurses; (2 fellows at 2 WTE; 5 nurses at 4.5 WTE. 1 WTE research assistant) | 7 days/week                                                    | 21<br>1 PA                                                                                         | 4                                                                            |
| Nurse/ CRN Greater Manchester        | 40              | 2000              | General                                | 4 (across ED); (4 WTE)                                                                    | 8-8pm 5 days/week (and on-call at weekends/nights as required) | 22<br>1 PA                                                                                         | 8/ 2 in set-up                                                               |
| Nurse/ CRN TV and South Midlands     | 9               | 500               | General                                | 0.5; (0.5 WTE)                                                                            | part/time (early/late shift pattern; weekdays)                 | 10<br>0.5 PA                                                                                       | 2                                                                            |
| Consultant/ CRN Wessex               | 11              | 750               | General                                | 4 + 0.5 trainee; (2.5 WTE + 0.5 WTE trainee)                                              | 7 days/week (plus trainee shifts)                              | 6<br>0 PA                                                                                          | 4                                                                            |
| Consultant/ CRN West Midlands        | 102             | 4000              | General/ Cardiac/ Trauma/ Burns/ Neuro | 7 (across ED/Trauma and ICU); (6 WTE including Trial Coordinator and administrators)      | 7 days/week                                                    | 34<br>1 PA                                                                                         | 7/ 2 in set-up                                                               |
| Consultant/ CRN North West Coast     | 33              | 1550              | General                                | 3 + 0.5 trainee; (2.5 WTE + 0.5 WTE trainee)                                              | 5 days/week (flexible)                                         | 17<br>1 PA                                                                                         | 3/ 1 in set-up                                                               |
| Consultant/ CRN West of England      | 15              | 5-600             | General                                | 0                                                                                         | n/a                                                            | 18<br>0.5 PA                                                                                       | 1/ 2 in set-up                                                               |

|                                     |    |       |                                      |                                                                       |                                                                   |                                                     |                |
|-------------------------------------|----|-------|--------------------------------------|-----------------------------------------------------------------------|-------------------------------------------------------------------|-----------------------------------------------------|----------------|
| Consultant/ CRN West of England     | 15 | 5-600 | General                              | 0**                                                                   | n/a                                                               | 18<br>0.5 PA                                        | 1/ 2 in set-up |
| Nurse/ CRN South West Peninsula     | 28 | 1700  | General/trauma/<br>Neuro/<br>Cardiac | 1 (across dermatology/ neuro); (1 WTE)                                | 8-4pm; 5 days/week                                                | 14<br><i>Data not provided /unknown</i>             | 0/ 1 in set-up |
| Nurse/ CRN West of England          | 20 | 1300  | General                              | 9; 5 WTE + 4 rotational posts                                         | 7-7pm; 7 days a week                                              | <i>Data not provided /unknown</i><br>2 PAs (shared) | 10             |
| Nurse/ CRN East Midlands            | 69 | 4000  | General/trauma/<br>Neuro             | 6 (covering ED) – split site; (4.2 WTE)                               | 7-7pm; 7 days/week                                                | <i>Data not provided /unknown</i><br>0 PA           | 13             |
| Nurse/ CRN Norfolk                  | 19 | 850   | General                              | 2 *; (1.45 WTE)                                                       | 8-4pm<br>5 days/week (and on-call at weekends/nights as required) | <i>Data not provided /unknown</i><br>0 PA           | 4/ 1 in set-up |
| Nurse/ Wales                        | 33 | 1500  | General/<br>Neuro                    | 5; (4 WTE)                                                            | 8-4pm 5 days/week                                                 | 14<br>1 PA                                          | 6              |
| Nurse/ CRN North West Coast         | 35 | 1880  | General                              | 2; (1 WTE nurse at band* 7 shared and 4 x nurse at band 6 at 0.8 WTE) | 7.30-3.30pm 5 days/week                                           | 13<br>0 PA                                          | 9              |
| Nurse/ CRN South West Peninsula     | 26 | 1580  | General/<br>Neuro                    | 1; ( <i>Data not provided /unknown</i> )                              | 8-4pm 5 days/week                                                 | 14<br>0 PA                                          | 7              |
| Nurse/ CRN North East North Cumbria | 18 | 1000  | General                              | 2; (1 nurse at band 3 research assistant; 1 nurse at band 6 WTE)      | 9-5pm 5 days/week                                                 | 9<br>0 PA                                           | 8              |
| Nurse/ CRN East Midlands            | 19 | 1200  | General                              | 3; (2.8 WTE)                                                          | 8-7pm                                                             | <i>Data not provided /unknown</i><br>2 PAs          | 11             |
| Nurse/ CRN Eastern                  | 20 | 1890  | General                              | 4; ( <i>Data not provided/unknown</i> )                               | 8-8pm                                                             | <i>Data not provided /unknown</i><br>1 PA           | 7              |
| Nurse/ CRN Greater Manchester       | 19 | 1700  | General                              | 0.8; (0.8 WTE)                                                        | 8-4pm                                                             | 12<br>0 PA                                          | 4              |
| Consultant/ CRN Wessex              | 24 | 1200  | General                              | 3; (1.6 WTE + 2 WTE for 3 month rotations)                            | 8am-12pm 7 days a week                                            | 14<br>2 PAs                                         | 5              |
| Consultant/ CRN London South        | 63 | 3500  | General/<br>Neuro                    | 9; (2 nurse at band 7; 7 nurse at band 6* WTE)                        | 8-8pm                                                             | <i>Data not provided /unknown</i><br>1 PA           | 10             |
| Nurse/ CRN West of England          | 21 | 2000  | General                              | 5; (4 WTE (1 nurse at band 7; remainder nurse at band 6)              | 7-7pm                                                             | 12<br><i>Data not provided /unknown</i>             | 8              |

† Level 2 beds are where patients require more detailed observation or intervention including support for a single failing organ system or post-operative care and those 'stepping down' from higher levels of care Level 3 beds only. Level 3 care is defined as patients needing advanced respiratory support alone or support of at least two organ systems. Note basic respiratory and basic cardiovascular support occurring on one day count as one organ. This level includes beds for all complex patients requiring support for multi-organ failure. Flexible critical care beds where there is a mix of level 2 and level 3 beds (NHS data dictionary: [https://www.datadictionary.nhs.uk/data\\_dictionary/attributes/u/unit\\_bed\\_configuration\\_de.asp?shownav=1](https://www.datadictionary.nhs.uk/data_dictionary/attributes/u/unit_bed_configuration_de.asp?shownav=1)) ††PAs=Professional Activities Sessions are four hour weekly sessions for consultants only \*Working across all Division 6 studies, not limited to critical care; Division 6 is one of six NIHR overarching divisions that encompasses critical care, anaesthesia/peri-operative/pain, emergency care/injuries, surgery, respiratory,

gastroenterology, infectious diseases/microbiology, hepatology, ophthalmology, ENT and \*\*Able to access other Division 6 nurses when studies are active. \* Band refers to the grade of nurse/research assistant as per Agenda for Change <https://www.nhsemployers.org/pay-pensions-and-reward/agenda-for-change/pay-scales/annual>. Band 7 is considered a senior nurse.
